# Supplementary material for: Flash-photolytic generation of dienols and dienolates from α,β-unsaturated esters and kinetics of their amine-catalyzed ketonization in nonaqueous media
Source: Royal Society of Chemistry journal article supplement (doi:10.1039/b601749e), 2006-03-20
Supplement: b601749e.pdf [file b601749e.pdf]

# Flash-Photolytic Generation of Dienols and Dienolates from $\alpha,\beta$ -Unsaturated Esters and Kinetics of their Amine-Catalyzed Ketonization in Nonaqueous Media

Françoise Hénin,\*<sup>a</sup> Stéphane Létinois,<sup>a</sup> Jacques Muzart,<sup>a</sup> Jakob Wirz\*<sup>b</sup>

## SUPPLEMENTARY INFORMATION

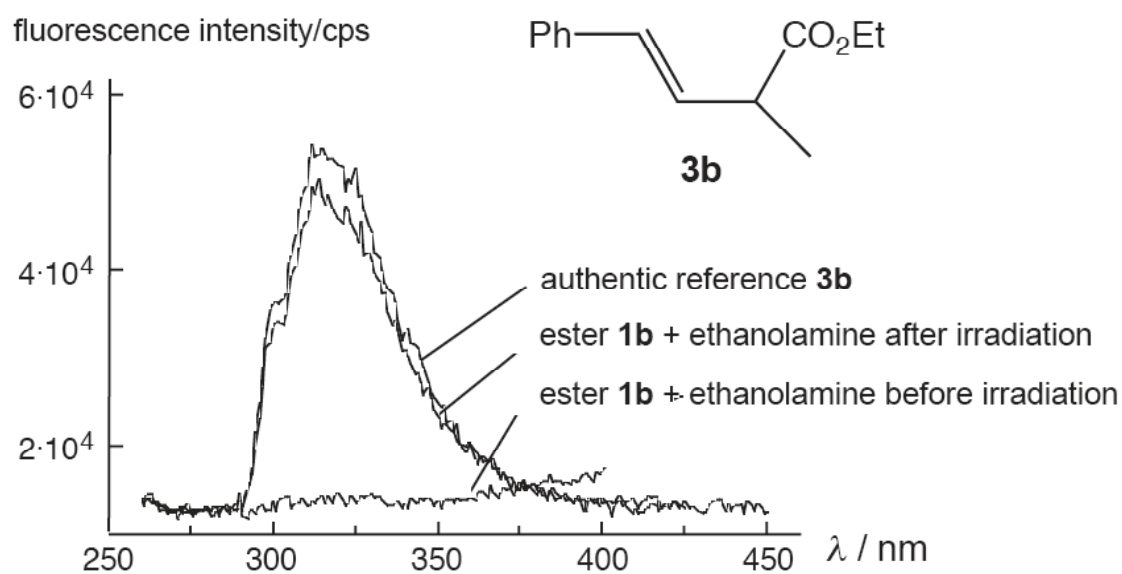

**Fig. S1** Comparison of the fluorescence spectra (uncorrected) of the deconjugated ester **3b** and an irradiated sample of the conjugated ester **1b**.

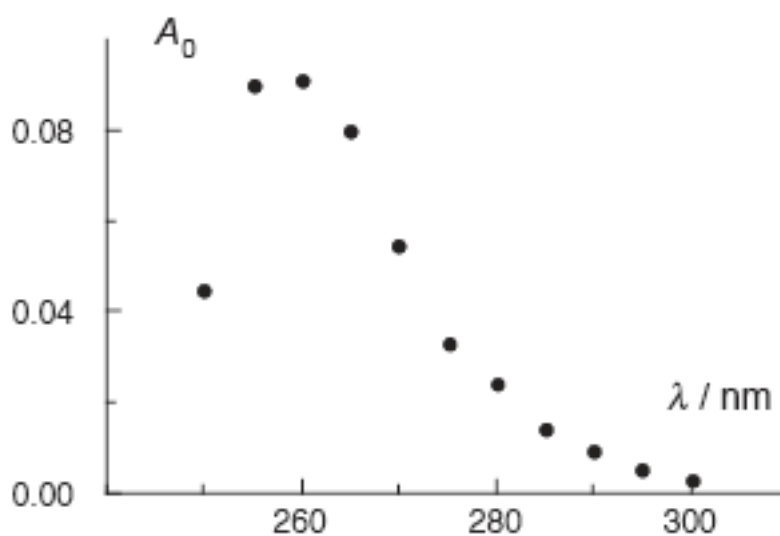

**Fig. S2** Transient absorption generated by CFP of **1a** with ethanolamine ( $1 \times 10^{-3}$  M) in acetonitrile.

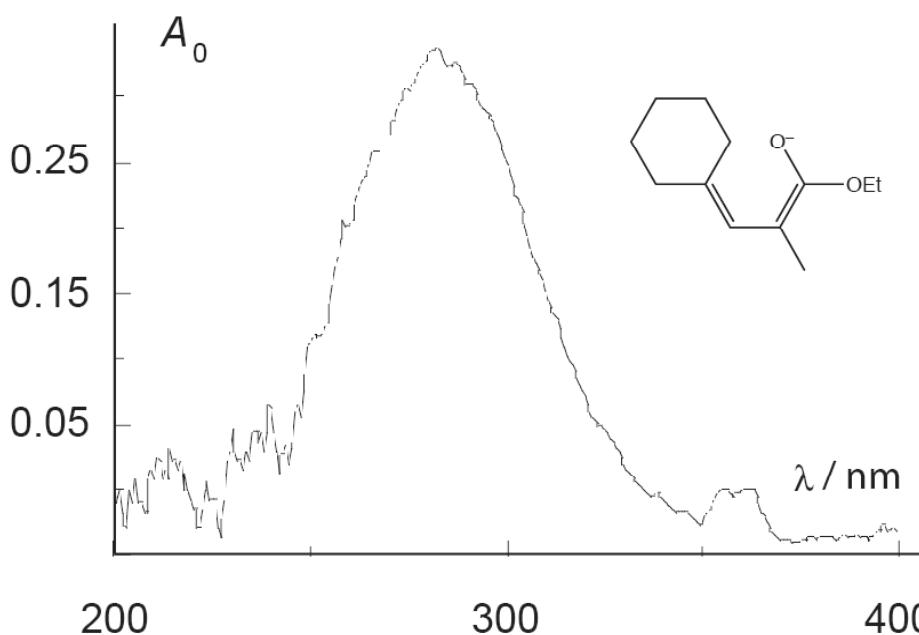

**Fig. S3** Transient absorption generated by LFP of ester **1a** in aqueous base (pH 10).

**Table S1:** Rate data for the decay of **1b** in acetonitrile in the presence of ethanolamine (**I**) at various temperatures.

| [I] <sub>0</sub> /M    | $k_{\text{obs}} \times 10^{-6}/\text{s}^{-1}$ |                                  |                                 |                                 |
|------------------------|-----------------------------------------------|----------------------------------|---------------------------------|---------------------------------|
|                        | 8.3 °C                                        | 16.6 °C                          | 26.8 °C                         | 38.3 °C                         |
| 0                      | 0.00211                                       | 0.0023                           | 0.0025                          | 0.0026                          |
| 0.0003                 | 0.51                                          | 0.52                             |                                 |                                 |
| 0.0005                 | 0.83                                          | 0.85                             | 0.77                            | 0.71                            |
| 0.0007                 | 1.15                                          | 1.14                             | 1.08                            | 0.97                            |
| 0.001                  | 1.55                                          | 1.58                             | 1.48                            | 1.33                            |
| 0.003                  | 4.13                                          | 4.22                             | 3.95                            | 3.63                            |
| 0.005                  | 6.3                                           | 6.47                             | 5.6                             | 5.14                            |
| 0.007                  | 7.87                                          | 8.72                             | 7.51                            | 6.67                            |
| 0.01                   | 9.21                                          | 10.25                            | 10.85                           | 9.55                            |
| 0.015                  | 12.45                                         | 13.6                             | 14.3                            | 14.8                            |
| 0.02                   | 14.95                                         | 16.65                            | 17.5                            | 19.1                            |
| 0.025                  | 15.55                                         | 19.0                             | 21.0                            | 22.0                            |
| 0.03                   | 16.8                                          | 20.0                             | 23.6                            | 23.5                            |
| 0.035                  | 16.8                                          |                                  |                                 |                                 |
| 0.04                   | 16.0                                          |                                  |                                 |                                 |
| limiting rate constant | $k/\text{s}^{-1}$                             | $k/\text{s}^{-1}$                | $k/\text{s}^{-1}$               | $k/\text{s}^{-1}$               |
|                        | $2.35 \times 10^7/\text{s}^{-1}$              | $3.59 \times 10^7/\text{s}^{-1}$ | $6.2 \times 10^7/\text{s}^{-1}$ | $8.0 \times 10^7/\text{s}^{-1}$ |
| dissociation constant  | $K_{\text{diss}}/\text{M}$                    | $K_{\text{diss}}/\text{M}$       | $K_{\text{diss}}/\text{M}$      | $K_{\text{diss}}/\text{M}$      |
|                        | 0.013                                         | 0.023                            | 0.049                           | 0.068                           |
